# Supplementary material for: Identification of microtubule growth deceleration and its regulation by conserved and novel proteins
Source: PubMed Central journal article supplement — Mol Biol Cell. 2016 May 1;27(9):1479–87. doi: 10.1091/mbc.E16-01-0056 (PMC4850035; doi:10.1091/mbc.e16-01-0056), 2016-05-01
Supplement: supp_E16-01-0056v1_CombinedSupMats.pdf [file supp_E16-01-0056v1_CombinedSupMats.pdf]

# Supplemental Materials

*Molecular Biology of the Cell*

Lacroix et al.

**Supplemental Information for:**

**Lacroix et al. Identification of microtubule growth deceleration and its regulation by conserved and novel proteins**

# Supplemental Figures.

## Figure S1

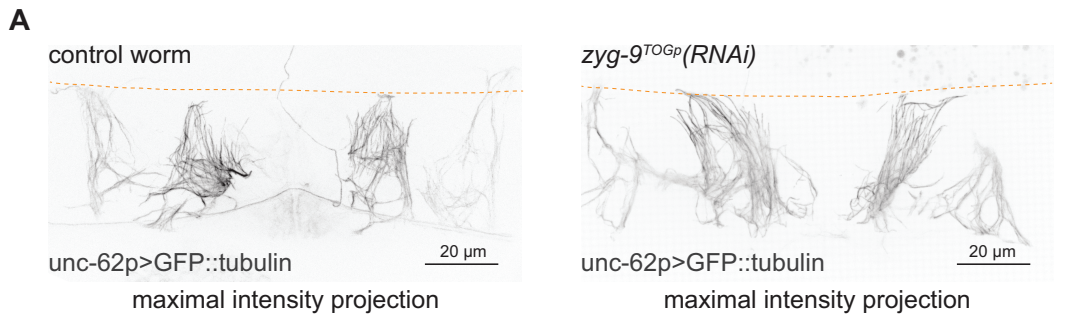

**B**

### background intensity drops near MT that do not decelerate

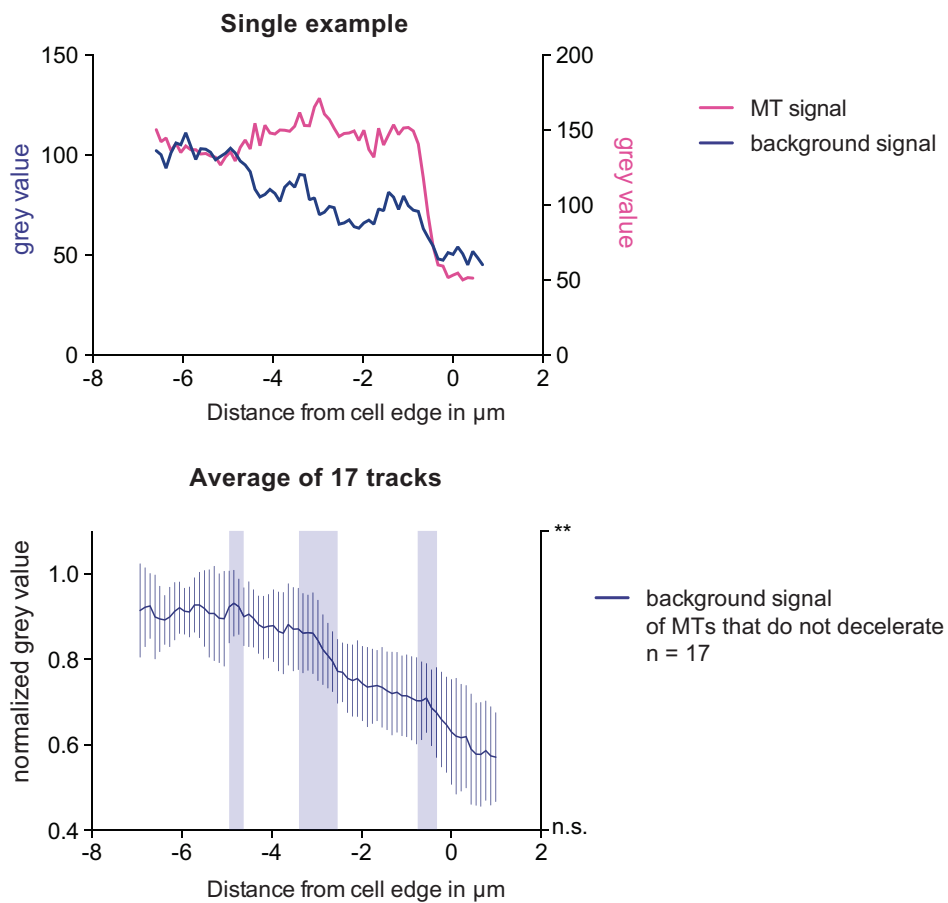

**Figure S1:** A drop in GFP-tubulin background intensity is observed in the vicinity of MTs that do not undergo growth deceleration. **(A)** Maximal intensity projections of 20  $\mu\text{m}$  z-stacks on adult MDX12 worm in control situation of after 27h of ZYG-9<sup>TOGp</sup> depletion by RNAi. GFP-tubulin under unc-62 promoter allows to visualize MT organization in uterine muscles which remains conserved after ZYG-9<sup>TOGp</sup> depletion. **(B)** Top: example of intensity profile of a non-decelerating MT (pink trace) and its adjacent background (blue trace) both representing GFP-tubulin signal. Bottom: 17 individual background traces were normalized to their maximal intensity value and averaged and aligned relative to cell edge. As in Figure 3 (see also Experimental Procedures), for each x-axis position, the 4 pixels (0.88  $\mu\text{m}$ ) before and after each position were compared by t-test to evaluate whether there was a significant drop in intensity. The vertical shaded bars represent pixels for which the difference was significant (\*\* =  $P \leq 0.01$ , plotted on right y-axis). Error bars = 95% confidence interval.

Figure S2

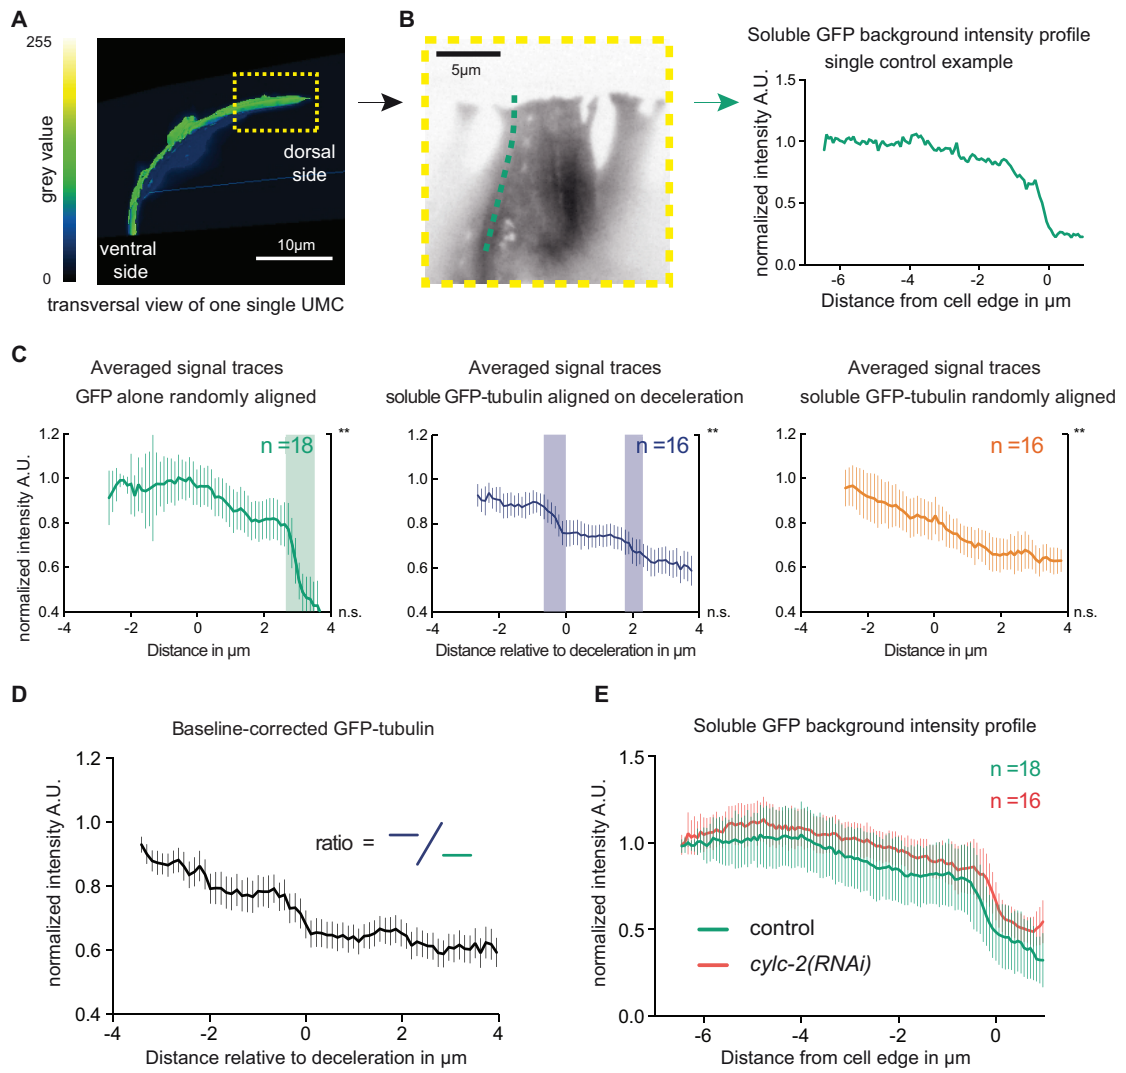

**Figure S2:** CYLC-2 depletion does not affect GFP distribution in UMCs. **(A)** Soluble GFP expressed in UMCs is used to reveal the cell topology and the organization of non-tubulin protein content. Transversal view of a 3D volume reconstruction pseudo-color made with Imaris software of an UMC expressing GFP under *unc-62* promoter. The image shows the continuously flat dorsal extension (yellow dashed rectangle represent the dorsal extension where deceleration occurs). **(B)** Single confocal plane of a UMC dorsal extension expressing soluble GFP and the measured GFP intensity of a single track along the UMC ventral-to-dorsal axis, as represented by the dotted green line. No obvious drop was detected, but intensity progressively reduced approaching the cell edge. **(C)** Green line represents the average intensity of several GFP alone tracks (as in B). Blue line corresponds to the average soluble GFP-tubulin signal of tracks (as main Figure 3) next to a decelerating MT in UMC. Blue traces were aligned on the deceleration point of the juxtaposed MT before being averaged. To generate the orange line, the same traces as in blue were aligned on a random point instead of the deceleration point. Since green and orange traces were randomly aligned, and because UMC dimensions are really constant, curves were arbitrarily positioned on the x-axis based on the expected position of deceleration relative to cell edge. The drop is not visible when traces are aligned on a random position and averaged (orange curve). As in Figure 3 and S1, for each x-axis position, the 4 pixels (0.88  $\mu\text{m}$ ) before and after each position were compared by t-test to evaluate whether there was a significant drop in intensity. The vertical shaded bars represent pixels for which the difference was significant (\*\* =  $P \leq 0.01$ ). **(D)** Ratio of soluble GFP-tubulin signal over GFP alone aligned on cell edge, the decay in GFP-tubulin is seen also on this “baseline-corrected” curve indicating that the decay is not simply due to a decay in global fluorescence intensity of any protein. **(E)** Average intensity profile of control (green) and CYLC-2 depleted cells (red) cell expressing soluble GFP. **(B to D)** all signals were normalized on the average of the first 7 pixels of the track as reference in order to minimize variation due to noise. Error bars = 95% confidence interval.

# Figure S3

## A

*Xl Stathmin1A* ----- - - - - - MCDSDIK VKQLEKRASG QAFELILSP SMDAAPDLSI  
*Cr\_12689* MISSFDLHV FVMLFGPVLL LIGCGGKKT PPPKSKSMT APPTAPAPP SVPEAAAAP AADAPAAAAD

*Xl Stathmin1A* TSPK--KKEC SLEEIQKLE AAEERRKLHE AEILKQLAEK REHEKEVLQK AIEENNNFSK MAEKLTTKM  
*Cr\_12689* GDKKSEKDV EKKEEKDE KKDEKKEE KKDGKKSEK KDDEKKDEEK KDEKKDEEK SKKSKSKS

*Xl Stathmin1A* ETIKENREQ IAAKLERLRE KDKKVEEIRK GKECKEPEK -----  
*Cr\_12689* NKS KSKSKS KDKKDGKDK EEKDKDEKE DKKDEKDE ENKDDDKKEE DKKE

## B

*Cr\_12689* MISSFDLHV FVMLFGPVLL LIGCGGKKT PPPKSKSMT APPTAPAP-P PSVPEAA-AA PPAADAPAAA  
*Ce\_C41G7.6* -MSPMDYLHA ILLLVGPLAA LIGCGGKKA PPPKASKMT AP-TAPAPAP PAAPDAPPVA PDAAAPADG

*Cr\_12689* A--DGDKKSE KKDVEKKEE KKDEKKDEEK KEEKKDGDK KSEKDD--D EKKDEKKDE KKDEKESKK  
*Ce\_C41G7.6* EKKDGDKKSE KKEGDEKKEE KKDEKDEEK KDEKKDGEK KSEKDEKDD DKKDKKDGK KEDEKDDK

*Cr\_12689* SKKSKSNKS KSKK-SKKD -KKDGKDE EK----- - - - - - KDKKEDDK DEKKDEENK  
*Ce\_C41G7.6* KDEKKDDK EDDKKGDKD EKKDDEKDD KKEAKSKSK SKKSKSKS KREKDDK DDKKDDK

*Cr\_12689* DDKKDEK E  
*Ce\_C41G7.6* DDEKDDK E

## C

*Ce\_C41G7.6* -MSPMDYLHA ILLLVGPLAA LIGCGGKKA PPPKASKMT APTAPAPAPP AAPDAPVAP DAAAAPADGE  
*Ce\_Y59E9AL.6* MMSPLDYLHV TLLLVGPLAI LIGCGGKKA PPPKASKMT APPAPASAPP AAPDAFAAP DAAAAPADGE

*Ce\_C41G7.6* KKDGDKSEK KEGDEKKEE KDEDKDEEK DEEKDGEK SEKKDEKDD KDKKDGK EDEKDEK-  
*Ce\_Y59E9AL.6* KKDGDKSEM KEGEKKNEK KEGDEKDEEK DEEKDGD--DKKDEKDD DKKDEKSDK KDEKDDK

*Ce\_C41G7.6* KDEKDDDK EDDKKGDKD EKKDDEKDD KKEAKSKSK SKKSKSKS KREKDD---- EDKDDDKD  
*Ce\_Y59E9AL.6* KDEKDDDK ED----- EKKDDKDD KKEAKSKSK SNKSKSKS KREKDDKDD EDKDDDKD

*Ce\_C41G7.6* DDKDDEKDD DEKKE  
*Ce\_Y59E9AL.6* DDKDDEKDD NEKKE

## D

*Ce\_Y59E9AL.6* ----- - - - - - MMS PLD-----  
*Hs\_CYLC2* MSLPRFQRVN FGPYDNYIPV SELSKSWNQ QHFALLFPKP QRPGTKRRSK PSQIRDNTVS IIDEEQLRGD

*Ce\_Y59E9AL.6* -----YLHVT LLLIG----- - - - - - PL AILIGCGGK KAPPPKASK MTAPPAPASA  
*Hs\_CYLC2* RRQPLWYRS LMRISERPSV YLAARRQPLK PTPTVEVDK AAEIGKKGED KTTQKDTTDS ESELKQGGK

*Ce\_Y59E9AL.6* PPAAPDAPA APDAAAAPAD GEK----- -KDGDKSEM KEGEKKNEK KE----- - - - - -  
*Hs\_CYLC2* SKKGIIEKG KEKLDKDK SKKGGKDAEK GKLSATESED EKGAKKDNK KDKKDSNKGK DSATESEGEK

*Ce\_Y59E9AL.6* -GDEKDEK- DEEKDGD- - - - - KKD EKKDD-KKD EKSDKDEK KDDKKEDEE KKDDK-  
*Hs\_CYLC2* GTEKDSKKG KDSKKGKDS AIELQAVKAD EKKDEDGKDK ANKGDSEKDA KDAKEIKKG KDKKPSST

*Ce\_Y59E9AL.6* EDEKDDDK DDKKAKSKS KSKSKSKS KSKREKDDK KDEDKDDK KDDKDEK KDNEKKE-  
*Hs\_CYLC2* DSKDDVVK ESKDATKDA KVAKDKTEK ESADSKDAK KNAKDAKD AKNAKDEK KDAKKGK

**Figure S3:** Sequence alignments of CYLC-1 and CYLC-2 ORFs with their homologues. The *C. elegans* genome contains genes with homology to stathmins and cylicin. Genes encoding stathmin had not been annotated in the *C. elegans* genome (Cassimeris, 2002). Using stathmin sequence from *Xenopus laevis* (gene name stmn1-a), the NCBI tools (PSI-BLAST and/or PHI-BLAST) were used to identify to find sequence, domain or pattern homology in nematodes genomes. Among these searches we identified *Caenorhabditis remanei* uncharacterized protein CRE12689 (NCBI sequence XP\_003108008.1). Wormbase BLAST search tools were used to search for similarity within the *Caenorhabditis elegans* genome. Alignments created with ClustalW algorithm (EMBL-EBI) are shown. (A) The *Xenopus laevis* stathmin-1-A is aligned with the *C. remanei* protein CRE12689. (B) The CRE12689 is aligned with the C41G7.6 protein identified in the *C. elegans* genome. (C) The two *C. elegans* proteins C41G7.6 and its close homologue Y59E9AL.6 are aligned. Y59E9AL.6 and C41G7.6, were named CYLC-1 and CYLC-2, respectively, based on their relative homology to human protein cylicin. (D) The *C. elegans* ORF Y59E9AL.6 is annotated in Wormbase as a homologue of the human protein Cylicin-2. (A, B, C and D) Identical bases are shaded; positions with negatively charged residues E or D in both sequences are framed.



## Figure S4

$$J = \frac{R_{\text{grow}} \cdot f_{\text{rescue}} - R_{\text{shrink}} \cdot f_{\text{cat}}}{f_{\text{cat}} + f_{\text{rescue}}}$$

$J > 0$  = unbounded state

$J < 0$  = bounded state

|                       | UMC global | dorsal  | inter.  | soma    |
|-----------------------|------------|---------|---------|---------|
| Growth rate           | 0.15       | 0.11    | 0.18    | 0.19    |
| Shrinkage rate        | 0.85       | 0.82    | 0.87    | 0.93    |
| Catastrophe frequency | 0.045      | 0.14    | 0.06    | 0.07    |
| Rescue frequency      | 0.28       | 0.55    | 0.35    | 0.38    |
|                       | $J > 0$    | $J < 0$ | $J > 0$ | $J > 0$ |

**Figure S4:** Prediction of the boundary state in UMCs and their subcellular regions. The equation devised by Leibler and colleagues calculates the average velocity of the growth of the MT population:  $J$  (Verde et al., 1992). This value is calculated using the four dynamics parameters:  $R_{\text{grow}}$  (growth rate),  $R_{\text{shrink}}$  (shrinkage rate),  $f_{\text{cata}}$  (catastrophe frequency) and  $f_{\text{rescue}}$  (rescue frequency). The table contains the parameters of MT dynamics from this study for UMCs and the 3 different subcellular regions: dorsal extension, intermediate and soma. Globally, measured dynamic instability parameters predict that MTs are in the unbounded state in UMCs, except in the dorsal extension.

**Figure S5**

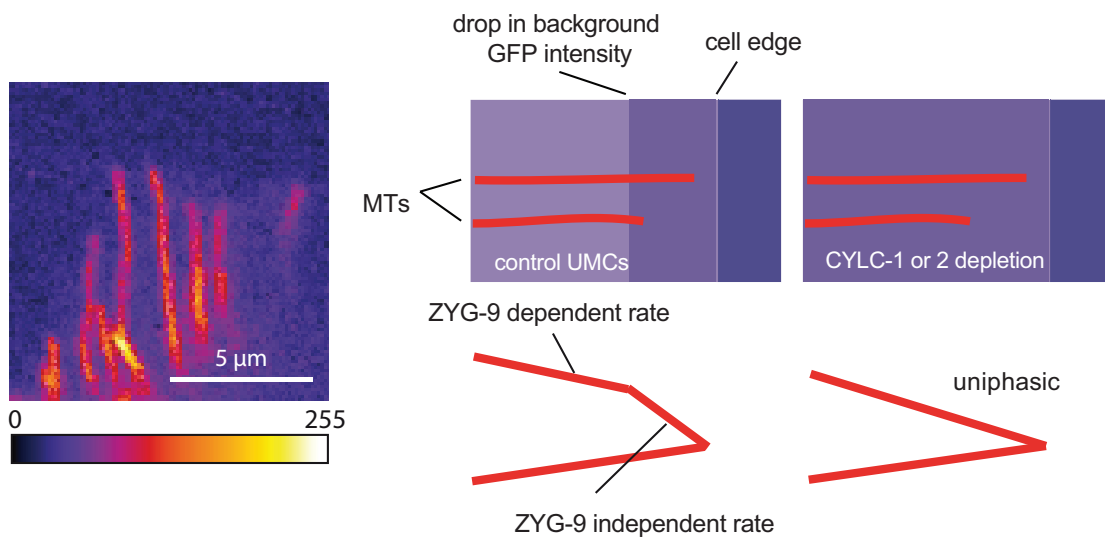

**Figure S5:** Model of MT deceleration regulation. Our results suggest that CYLC-1 and CYLC-2 promote soluble tubulin compartmentalization in UMCs cytoplasm with a reduced tubulin concentration at the dorsal cell extension and/or regulate ZYG-9 activity in the dorsal extension. The compartmentalization allows two distinct behaviors to be adopted by a single MT. First, ZYG-9<sup>TOGp</sup> mediates rapid, persistent growth excursions; second, MTs exhibit a slower growth phase when reaching the periphery of the dorsal extension. In this region, MTs also display distinct dynamics, including higher rescue and catastrophe frequencies, in addition to reduced growth rate.

## Supplemental Tables

### Tables S1

| population                                  | A    |      |    | B     |      |    | C     |      |    |
|---------------------------------------------|------|------|----|-------|------|----|-------|------|----|
|                                             | mean | sem  | n  | mean  | sem  | n  | mean  | sem  | n  |
| Growth rate ( $\mu\text{m}/\text{sec}$ )    | 0.11 | 0.01 | 63 | 0.18  | 0.01 | 31 | 0.19  | 0.01 | 35 |
| Growth length ( $\mu\text{m}$ )             | 0.75 | 0.05 | 63 | 2.79  | 0.22 | 31 | 2.62  | 0.20 | 35 |
| Growth duration (sec)                       | 6.96 | 0.34 | 63 | 16.76 | 1.89 | 31 | 14.21 | 1.13 | 35 |
| Shrinking rate ( $\mu\text{m}/\text{sec}$ ) | 0.82 | 0.06 | 48 | 0.87  | 0.05 | 33 | 0.93  | 0.04 | 33 |
| Shrinking length ( $\mu\text{m}$ )          | 1.33 | 0.15 | 48 | 2.33  | 0.17 | 33 | 2.38  | 0.22 | 33 |
| Shrinking duration (sec)                    | 1.83 | 0.25 | 48 | 2.85  | 0.22 | 33 | 2.64  | 0.24 | 33 |
| Catastrophe ( $\text{sec}^{-1}$ )           | 0.14 | 0.01 | 63 | 0.06  | 0.01 | 31 | 0.07  | 0.01 | 35 |
| Catastrophe ( $\mu\text{m}^{-1}$ )          | 1.34 | 0.09 | 63 | 0.36  | 0.03 | 31 | 0.38  | 0.03 | 35 |
| Rescue ( $\text{sec}^{-1}$ )                | 0.55 | 0.07 | 48 | 0.35  | 0.03 | 33 | 0.38  | 0.03 | 33 |
| Rescue ( $\mu\text{m}^{-1}$ )               | 0.75 | 0.09 | 48 | 0.43  | 0.03 | 33 | 0.42  | 0.04 | 33 |

**Table S1:** Dynamic parameters of MTs in different topological subcellular compartment called region A (At the cell edge), B (before the cell edge) and C (C center). The region A corresponds to the last 2  $\mu\text{m}$  before the UMC-seam cells contact on the dorsal cellular extension of UMCs. n: number of MTs per condition. n(worms)  $\geq 12$ .

### Tables S2

| population                                  | initial |       |    | terminal |       |    | total |       |     |
|---------------------------------------------|---------|-------|----|----------|-------|----|-------|-------|-----|
|                                             | mean    | sem   | n  | mean     | sem   | n  | mean  | sem   | n   |
| Growth rate ( $\mu\text{m}/\text{sec}$ )    | 0.22    | 0.01  | 98 | 0.10     | 0.002 | 69 | 0.15  | 0.003 | 169 |
| Growth length ( $\mu\text{m}$ )             | 3.23    | 0.10  | 98 | 1.24     | 0.02  | 69 | 3.21  | 0.08  | 169 |
| Growth duration (sec)                       | 15.67   | 0.55  | 98 | 13.92    | 0.41  | 69 | 22.34 | 0.56  | 169 |
| Shrinking rate ( $\mu\text{m}/\text{sec}$ ) | 0.89    | 0.03  | 98 | 0.72     | 0.03  | 69 | 0.85  | 0.02  | 169 |
| Catastrophe ( $\text{sec}^{-1}$ )           | 0.06    | 0.002 | 98 | 0.07     | 0.002 | 69 | 0.04  | 0.001 | 169 |
| Rescue ( $\text{sec}^{-1}$ )                | 0.21    | 0.01  | 98 | 0.51     | 0.03  | 69 | 0.28  | 0.01  | 169 |

**Table S2:** Dynamic parameters of initial and terminal phases of biphasic MTs are compared to the total MT population in UMCs. n: number of MTs per condition. n(worms)  $\geq 10$ .

## Tables S3

| Dynamic parameters    | control |       |     | control (terminal) |       |     | cylc-1(RNAi) |       |     | cylc-2(RNAi) |       |     | zyg-9(RNAi) |       |     |
|-----------------------|---------|-------|-----|--------------------|-------|-----|--------------|-------|-----|--------------|-------|-----|-------------|-------|-----|
|                       | mean    | SEM   | n   | mean               | SEM   | n   | mean         | SEM   | n   | mean         | SEM   | n   | mean        | SEM   | n   |
| Growth rate           | 0,18    | 0,003 | 199 | 0,11               | 0,002 | 265 | 0,18         | 0,005 | 182 | 0,13         | 0,003 | 312 | 0,09        | 0,002 | 298 |
| Growth length         | 2,25    | 0,11  | 198 | 0,60               | 0,02  | 265 | 3,22         | 0,15  | 182 | 2,85         | 0,12  | 312 | 1,19        | 0,06  | 298 |
| Growth duration       | 12,36   | 0,57  | 198 | 5,53               | 0,17  | 265 | 19,13        | 0,89  | 182 | 24,40        | 1,10  | 312 | 12,68       | 0,58  | 298 |
| Shrinkage rate        | 0,80    | 0,03  | 139 | 0,82               | 0,03  | 139 | 0,66         | 0,02  | 222 | 0,71         | 0,02  | 340 | 0,57        | 0,02  | 156 |
| Shrinkage length      | 2,88    | 0,19  | 139 | 1,17               | 0,05  | 139 | 3,91         | 0,26  | 222 | 4,02         | 0,22  | 340 | 2,40        | 0,11  | 156 |
| Shrinkage duration    | 3,83    | 0,27  | 139 | 1,53               | 0,07  | 139 | 2,53         | 0,16  | 222 | 2,63         | 0,14  | 340 | 4,75        | 0,26  | 156 |
| Catastrophe frequency | 0,08    | 0,004 | 199 | 0,18               | 0,01  | 265 | 0,05         | 0,002 | 182 | 0,04         | 0,002 | 312 | 0,08        | 0,004 | 298 |
| Rescue frequency      | 0,26    | 0,02  | 139 | 0,65               | 0,03  | 139 | 0,26         | 0,02  | 222 | 0,25         | 0,01  | 340 | 0,21        | 0,01  | 156 |

**Table S3:** Effect of CYLC-1, CYLC-2 and ZYG-9<sup>TOGp</sup> depletions on MT dynamics in UMCs of adult worms. Units are  $\mu\text{m}/\text{sec}$  for rates,  $\mu\text{m}$  for lengths, *seconds* for durations and  $\text{seconds}^{-1}$  for frequencies. n: number of MTs per condition. n(worms)  $\geq$  12.

## Supplemental References

Cassimeris, L. 2002. The oncoprotein 18/stathmin family of microtubule destabilizers. *Curr Opin Cell Biol.* 14:18-24.

Verde, F., M. Dogterom, E. Stelzer, E. Karsenti, and S. Leibler. 1992. Control of microtubule dynamics and length by cyclin A- and cyclin B-dependent kinases in *Xenopus* egg extracts. *J Cell Biol.* 118:1097-1108.
